# Supplementary material for: Circulating sclerostin is associated with bone mineral density independent of HIV-serostatus
Source: PubMed Central journal article supplement — Bone Rep. 2020 May 11;12:100279. doi: 10.1016/j.bonr.2020.100279 (PMC7235609; doi:10.1016/j.bonr.2020.100279), 2020-05-11
Supplement: mmc1.pdf [file mmc1.pdf]

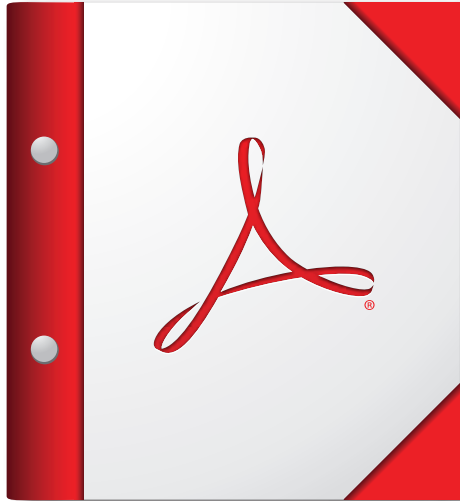

**For the best experience, open this PDF portfolio in  
Acrobat X or Adobe Reader X, or later.**

[Get Adobe Reader Now!](#)
